# Supplementary material
Source: PubMed Central journal article supplement (PMC4946051)

# Figure S1

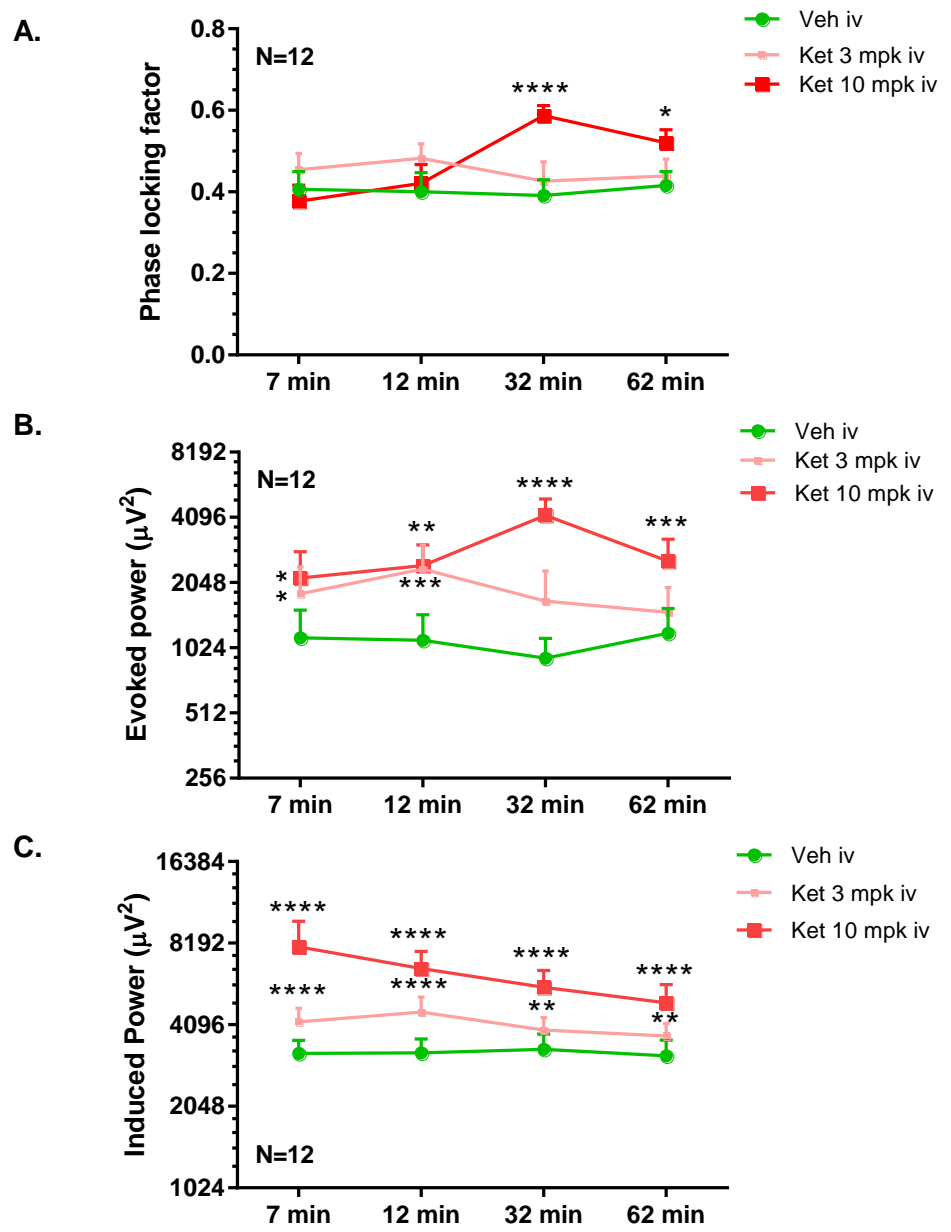

Supplement: npp201617x1.pdf [file npp201617x1.pdf]
